# Supplementary material
Source: publisher figshare collection journal article supplement (https://tandf.figshare.com/ndownloader/files/18046970)
Supplement: Supplementary file 1 [file 18046970]

## Sheet: Appendix I
SAMPLE	HAPLO	SITE	Date of collection	State	Country	LATITUDE	LONGITUDE	Elevation	Clade	GenBank accession
BZ001		MG91	2014-02-08	MG	Brazil	-20.4305	-43.5554	1263	P. longiformis	MK965982
BZ002	BZ73	MG107	2014-02-08	MG	Brazil	-20.4391	-43.5612	1249	P. fuscescens
BZ003	BZ73	RS102	2014-02-15	RS	Brazil	-29.3969	-50.8987	823	P. fuscescens
BZ007	BZ97	MG65	2014-05-09	MG	Brazil	-20.4228	-42.9521	426	P. longiformis	MK965983
BZ008	BZ97	RS111	2014-02-13	RS	Brazil	-29.4678	-50.639	780	P. longiformis	MK965975
BZ009	BZ97	RS111	2014-02-13	RS	Brazil	-29.4678	-50.639	780	P. longiformis
BZ011	BZ97	RS1	2014-02-12	RS	Brazil	-29.6363	-51.1352	48	P. longiformis
BZ013	BZ73	BAH128	2014-02-07	BAH	Brazil	-12.606	-38.0494	12	P. fuscescens	MK995109
BZ014	BZ97	RS124	2014-02-15	RS	Brazil	-29.3242	-50.6811	823	P. longiformis
BZ015	BZ158	BAH75	2014-02-06	BAH	Brazil	-12.5568	-38.8691	216	Paectes n. sp.	MK965985
BZ016	BZ97	MG102	2014-05-09	MG	Brazil	-20.6298	-42.7515	727	P. longiformis
BZ018	BZ73	MG101	2014-05-09	MG	Brazil	-20.8154	-42.8269	721	P. fuscescens	MK995111
BZ019	BZ73	MG109	2014-02-08	MG	Brazil	-20.4184	-43.5351	1255	P. fuscescens	MK995112
BZ021	BZ73	MG102	2014-05-09	MG	Brazil	-20.6298	-42.7515	727	P. fuscescens
BZ022	BZ97	MG102	2014-05-09	MG	Brazil	-20.6298	-42.7515	727	P. longiformis
BZ023	BZ97	MG101	2014-05-09	MG	Brazil	-20.8154	-42.8269	721	P. longiformis
BZ024	BZ73	MG101	2014-05-09	MG	Brazil	-20.8154	-42.8269	721	P. fuscescens	MK965997
BZ025	BZ73	MG102	2014-05-09	MG	Brazil	-20.6298	-42.7515	727	P. fuscescens	MK995114
BZ027	BZ97	MG101	2014-05-09	MG	Brazil	-20.8154	-42.8269	721	P. longiformis
BZ030	BZ97	MG102	2014-05-09	MG	Brazil	-20.6298	-42.7515	727	P. longiformis
BZ033	BZ73	MG109	2014-02-08	MG	Brazil	-20.4184	-43.5351	1255	P. fuscescens
BZ034	BZ73	RS102	2014-02-15	RS	Brazil	-29.3969	-50.8987	823	P. fuscescens	MK995115
BZ035	BZ97	RS102	2014-02-15	RS	Brazil	-29.3969	-50.8987	823	P. longiformis
BZ036	BZ73	MG107	2014-02-08	MG	Brazil	-20.4391	-43.5612	1249	P. fuscescens
BZ037	BZ73	MG67	2014-02-09	MG	Brazil	-20.3778	-43.1873	498	P. fuscescens
BZ040	BZ73	MG109	2014-02-08	MG	Brazil	-20.4184	-43.5351	1255	P. fuscescens
BZ042	BZ97	RS109	2014-02-13	RS	Brazil	-29.6604	-50.6225	34	P. longiformis
BZ043	BZ97	RS109	2014-02-13	RS	Brazil	-29.6604	-50.6225	34	P. longiformis	MK965980
BZ045	BZ73	RS124	2014-02-15	RS	Brazil	-29.3242	-50.6811	823	P. fuscescens	MK965986
BZ049	BZ73	RS102	2014-02-15	RS	Brazil	-29.3969	-50.8987	823	P. fuscescens	MK995116
BZ050	BZ97	RS111	2014-02-13	RS	Brazil	-29.4678	-50.639	780	P. longiformis
BZ052	BZ73	RS111	2014-02-13	RS	Brazil	-29.4678	-50.639	780	P. fuscescens	MK995117
BZ053	BZ97	RS110	2014-02-13	RS	Brazil	-29.5737	-50.7448	335	P. longiformis
BZ055	BZ97	RS111	2014-02-13	RS	Brazil	-29.4678	-50.639	780	P. longiformis
BZ057	BZ73	MG108	2014-02-08	MG	Brazil	-20.4205	-43.5529	1320	P. fuscescens
BZ061	BZ73	MG43	2014-02-09	MG	Brazil	-20.5283	-42.9004	581	P. fuscescens
BZ062	BZ73	MG108	2014-02-08	MG	Brazil	-20.4205	-43.5529	1320	P. fuscescens
BZ063	BZ97	RS123	2014-02-15	RS	Brazil	-29.3574	-50.9857	507	P. longiformis
BZ065	BZ73	MG102	2014-05-09	MG	Brazil	-20.6298	-42.7515	727	P. fuscescens
BZ067	BZ97	RS102	2014-02-15	RS	Brazil	-29.3969	-50.8987	823	P. longiformis	MK965981
BZ068	BZ73	RS102	2014-02-15	RS	Brazil	-29.3969	-50.8987	823	P. fuscescens
BZ071	BZ97	RS102	2014-02-15	RS	Brazil	-29.3969	-50.8987	823	P. longiformis
BZ073	BZ73	MG108	2014-02-08	MG	Brazil	-20.4205	-43.5529	1320	P. fuscescens	MK995118
BZ074	BZ97	RS122	2014-02-15	RS	Brazil	-29.3514	-50.9933	538	P. longiformis
BZ076	BZ97	RS124	2014-02-15	RS	Brazil	-29.3242	-50.6811	823	P. longiformis
BZ080	BZ73	RS102	2014-02-15	RS	Brazil	-29.3969	-50.8987	823	P. fuscescens	MK995119
BZ082	BZ97	RS122	2014-02-15	RS	Brazil	-29.3514	-50.9933	538	P. longiformis
BZ083	BZ97	RS122	2014-02-15	RS	Brazil	-29.3514	-50.9933	538	P. longiformis
BZ085	BZ73	RS122	2014-02-15	RS	Brazil	-29.3514	-50.9933	538	P. fuscescens
BZ087	BZ73	MG109	2014-02-08	MG	Brazil	-20.4184	-43.5351	1255	P. fuscescens	MK995120
BZ091	BZ97	RS125	2014-02-15	RS	Brazil	-29.4642	-50.6302	835	P. longiformis	MK995121
BZ092	BZ97	RS109	2014-02-13	RS	Brazil	-29.6604	-50.6225	34	P. longiformis
BZ094	BZ97	RS111	2014-02-13	RS	Brazil	-29.4678	-50.639	780	P. longiformis
BZ097	BZ97	RS115	2014-02-14	RS	Brazil	-30.6758	-51.4298	9	P. longiformis	MK965979
BZ098	BZ73	RS94	2014-02-11	RS	Brazil	-29.9248	-51.6963	15	P. fuscescens
BZ100	BZ73	MG102	2014-05-09	MG	Brazil	-20.6298	-42.7515	727	P. fuscescens
BZ108	BZ73	RS102	2014-02-15	RS	Brazil	-29.3969	-50.8987	823	P. fuscescens	MK995108
BZ111	BZ73	RS102	2014-02-15	RS	Brazil	-29.3969	-50.8987	823	P. fuscescens
BZ112	BZ73	RS110	2014-02-13	RS	Brazil	-29.5737	-50.7448	335	P. fuscescens
BZ116	BZ97	MG102	2014-05-09	MG	Brazil	-20.6298	-42.7515	727	P. longiformis
BZ118	BZ73	RS122	2014-02-15	RS	Brazil	-29.3514	-50.9933	538	P. fuscescens
BZ119	BZ97	RS122	2014-02-15	RS	Brazil	-29.3514	-50.9933	538	P. longiformis
BZ121	BZ97	RS111	2014-02-13	RS	Brazil	-29.4678	-50.639	780	P. longiformis
BZ124	BZ97	RS122	2014-02-15	RS	Brazil	-29.3514	-50.9933	538	P. longiformis
BZ127	BZ73	MG106	2014-08-16	MG	Brazil	-20.4426	-43.5673	1189	P. fuscescens
BZ130	BZ73	MG109	2014-02-08	MG	Brazil	-20.4184	-43.5351	1255	P. fuscescens	MK995110
BZ131	BZ97	RS1	2014-02-12	RS	Brazil	-29.6363	-51.1352	48	P. longiformis
BZ137	BZ158	SC40	2014-08-15	SC	Brazil	-26.9203	-48.6414	9	Paectes n. sp.
BZ138	BZ158	SC40	2014-08-15	SC	Brazil	-26.9203	-48.6414	9	Paectes n. sp.
BZ143	BZ158	Mlab	2014-08-12	SC	Brazil	-26.8905	-49.0854	70	Paectes n. sp.
BZ144	BZ158	Mlab	2014-08-12	SC	Brazil	-26.8905	-49.0854	70	Paectes n. sp.
BZ145	BZ158	Mlab	2014-08-12	SC	Brazil	-26.8905	-49.0854	70	Paectes n. sp.
BZ146	BZ158	SC52	2014-08-14	SC	Brazil	-27.0496	-48.5944	7	Paectes n. sp.
BZ147	BZ158	SC6	2015-05-30	SC	Brazil	-28.1102	-48.682	8	Paectes n. sp.
BZ148	BZ158	SC52	2014-08-14	SC	Brazil	-27.0496	-48.5944	7	Paectes n. sp.
BZ150	BZ158	SC6	2015-05-30	SC	Brazil	-28.1102	-48.682	8	Paectes n. sp.
BZ152	BZ158	SC52	2014-08-14	SC	Brazil	-27.0496	-48.5944	7	Paectes n. sp.
BZ153	BZ158	SC52	2014-08-14	SC	Brazil	-27.0496	-48.5944	7	Paectes n. sp.	MK965987
BZ154	BZ158	SC8-10	2014-08-14	SC	Brazil	-26.9953	-48.5977	57	Paectes n. sp.
BZ155	BZ158	SC8-10	2014-08-14	SC	Brazil	-26.9953	-48.5977	57	Paectes n. sp.
BZ156	BZ158	SC6	2015-05-30	SC	Brazil	-28.1102	-48.682	8	Paectes n. sp.
BZ157	BZ158	SC6	2015-05-30	SC	Brazil	-28.1102	-48.682	8	Paectes n. sp.
BZ158	BZ158	SC52	2014-08-14	SC	Brazil	-27.0496	-48.5944	7	Paectes n. sp.	MK965988
BZ166	BZ97	MG 92	2015-06-01	MG	Brazil	-20.2811	-43.7263	929	P. longiformis
BZ170	BZ97	BAH 131	2015-06-04	BAH	Brazil	-12.5489	-38.6815	18	P. longiformis
BZ176	BZ158	BAH 01	2015-06-06	BAH	Brazil	-12.91	-38.338	9	Paectes n. sp.
BZ178	BZ158	SC 39	2015-05-30	SC	Brazil	-27.7685	-48.5078	7	Paectes n. sp.
BZ184	BZ158	SC 39	2015-05-30	SC	Brazil	-27.7685	-48.5078	7	Paectes n. sp.
BZ192	BZ158	BAH 131	2015-06-04	BAH	Brazil	-12.5489	-38.6815	18	Paectes n. sp.
BZ194	BZ97	BAH 131	2015-06-04	BAH	Brazil	-12.5489	-38.6815	18	P. longiformis
BZ195	BZ97	BAH 131	2015-06-04	BAH	Brazil	-12.5489	-38.6815	18	P. longiformis
BZ200	BZ97	BAH 131	2015-06-04	BAH	Brazil	-12.5489	-38.6815	18	P. longiformis
BZ208	BZ158	BAH 56		BAH	Brazil	-12.677	-38.5544	31	Paectes n. sp.
BZ211	BZ158	SC 49	2015-05-31	SC	Brazil	-27.4416	-48.5012	-1	Paectes n. sp.
BZ214	BZ97	MG 67	2014-08-17	MG	Brazil	-20.3778	-43.1873	498	P. longiformis
BZ231	BZ158	BAH 59	2015-06-05	BAH	Brazil	-12.6136	-38.6557	26	Paectes n. sp.
BZ239	BZ158	BAH 01	2015-06-06	BAH	Brazil	-12.91	-38.338	9	Paectes n. sp.
BZ241	BZ158	SC 6	2015-05-30	SC	Brazil	-28.1102	-48.682	8	Paectes n. sp.
BZ244	BZ158	BAH 01	2015-06-06	BAH	Brazil	-12.91	-38.338	9	Paectes n. sp.	MK965989
BZ245	BZ158	BAH 01	2015-06-06	BAH	Brazil	-12.91	-38.338	9	Paectes n. sp.	MK995113
BZ247	BZ158	SC 39	2015-05-30	SC	Brazil	-27.7685	-48.5078	7	Paectes n. sp.
C1		Arg1	2015-03-21	ER	Argentina	-31.1909	-58.0827		P. longiformis	MK965974
C2		Arg5	2015-03-21	ER	Argentina	-31.1909	-58.0827		P. fuscescens	MK995101
C7-par			2015-03-21	ER	Argentina	-31.1909	-58.0827		P. longiformis
C8		Arg6	2015-03-21	ER	Argentina	-31.1909	-58.0827		P. fuscescens	MK995102
MIT2		Arg4	2015-03-21	COR	Argentina	-28.1756	-56.1064		P. longiformis	MK965978
MIT11		Arg7	2015-03-21	COR	Argentina	-28.1756	-56.1064		P. fuscescens	MK995103
MIT12		Arg3	2015-03-21	COR	Argentina	-28.1756	-56.1064		P. longiformis	MK965977
G16F		Arg2	2015-03-21	COR	Argentina	-28.1753	-55.6439		P. longiformis	MK965976
FL01		SP02	2015-04-16	FLA	USA	27.3248	-80.4081		P. fuscescens
FL02		SP02	2015-04-16	FLA	USA	27.3248	-80.4081		P. fuscescens
FL03		SP03	2015-04-16	FLA	USA	28.0707	-80.6212		P. fuscescens
FL04		SP08	2015-04-23	FLA	USA	26.2727	-81.7174		P. fuscescens
FL05		SP08	2015-04-23	FLA	USA	26.2727	-81.7174		P. fuscescens	MK995104
FL06		SP08	2015-04-23	FLA	USA	26.2727	-81.7174		P. fuscescens	MK995105
FL07		SP08	2015-04-23	FLA	USA	26.2727	-81.7174		P. fuscescens	MK965996
FL08		SU04	2015-07-21	FLA	USA	28.1238	-81.651		P. fuscescens	MK995122
FL09		SU04	2015-07-21	FLA	USA	28.1238	-81.651		P. fuscescens	MK995106
FL10		SU04	2015-07-21	FLA	USA	28.1238	-81.651		P. nana	MK965994
FL11		SU04	2015-07-21	FLA	USA	28.1238	-81.651		P. fuscescens
FL12		SU04	2015-07-21	FLA	USA	28.1238	-81.651		P. fuscescens
FL13		SU04	2015-07-21	FLA	USA	28.1238	-81.651		P. fuscescens	MK995107
FL14		SU04	2015-07-21	FLA	USA	28.1238	-81.651		P. fuscescens
FL15		SU04	2015-07-21	FLA	USA	28.1238	-81.651		P. nana
FL16		SU04	2015-07-21	FLA	USA	28.1238	-81.651		P. fuscescens
FL17		SU04	2015-07-21	FLA	USA	28.1238	-81.651		P. nana
FL18		SU04	2015-07-21	FLA	USA	28.1238	-81.651		P. fuscescens
FL19		SU06	2015-07-23	FLA	USA	27.2707	-81.3665		P. fuscescens
FL20		SU06	2015-07-23	FLA	USA	27.2707	-81.3665		P. fuscescens
FL21		SU10	2015-07-22	FLA	USA	27.2713	-82.4564		P. fuscescens
FL22		SU10	2015-07-22	FLA	USA	27.2713	-82.4564		P. fuscescens
FL23		SU12	2015-07-21	FLA	USA	26.7055	-80.1699		P. fuscescens
FL24		SU12	2015-07-21	FLA	USA	26.7055	-80.1699		P. nana
FL25		SU13	2015-07-21	FLA	USA	28.0256	-80.6212		P. fuscescens
FL26		SU13	2015-07-21	FLA	USA	28.0256	-80.6212		P. fuscescens
FL27		SU13	2015-07-21	FLA	USA	28.0256	-80.6212		P. fuscescens
FL28		SU13	2015-07-21	FLA	USA	28.0256	-80.6212		P. fuscescens
FL29		SU14	2015-07-22	FLA	USA	28.4686	-80.8608		P. fuscescens
FL30		SU15	2015-07-22	FLA	USA	27.987	-82.3524		P. fuscescens
FL31		SU15	2015-07-22	FLA	USA	27.987	-82.3524		P. fuscescens
FL32		SU15	2015-07-22	FLA	USA	27.987	-82.3524		P. nana
FL33		SU17	2015-07-22	FLA	USA	26.1556	-81.6511		P. fuscescens
FL34		SU17	2015-07-22	FLA	USA	26.1556	-81.6511		P. fuscescens
FL36		SU17	2015-07-22	FLA	USA	26.1556	-81.6511		P. fuscescens
FL37		SU18	2015-07-23	FLA	USA	26.166910,	-81.0777		P. fuscescens
FL38		SU18	2015-07-23	FLA	USA	26.166910,	-81.0777		P. fuscescens
FL39		SU19	2015-07-23	FLA	USA	26.7475	-80.6825		P. fuscescens
FL40		SU20	2015-07-23	FLA	USA	27.2106	-80.7914		P. nana
FL41		SU20	2015-07-23	FLA	USA	27.2106	-80.7914		P. fuscescens
FL42		SU20	2015-07-23	FLA	USA	27.2106	-80.7914		P. fuscescens
FL43		SU20	2015-07-23	FLA	USA	27.2106	-80.7914		P. nana
FL44		SU20	2015-07-23	FLA	USA	27.2106	-80.7914		P. fuscescens
FL135		IPRL	2015-08-01	FLA	USA	26.0846	-80.2396		P. nana	MK965995
FL172		IPRL	2015-09-15	FLA	USA	26.0846	-80.2396		P. nana
FLQ39		IPRL	2015-09-01	FLA	USA	26.0846	-80.2396		P. fuscescens
BAH: Bahia; COR: Corrientes; ER: Entre Rios; FLA: Florida; MG: Minas Gerias; SC: Santa Catarina; RS: Rio Grande do Sul;
